# Supplementary material
Source: PubMed Central journal article supplement (PMC4131725)
Supplement: NIHMS559587-supplement-1.pdf [file NIHMS559587-supplement-1.pdf]

## Supplementary Information

### Inhibition of *miR-25* Improves Cardiac Contractility in the Failing Heart

Christine Wahlquist\*<sup>1</sup>, Dongtak Jeong\*<sup>2</sup>, Agustin Rojas-Muñoz<sup>1</sup>, Changwon Kho<sup>2</sup>, Ahyoung Lee<sup>2</sup>, Shinichi Mitsuyama<sup>2</sup>, Alain van Mil<sup>1,3</sup>, Woo Jin Park<sup>4</sup>  
Joost P. Sluijter<sup>3</sup>, Pieter A. Doevendans<sup>3</sup>, Roger J. Hajjar<sup>2</sup>, and Mark Mercola<sup>1</sup>

\*co-first authors

<sup>1</sup>Department of Bioengineering,  
University of California, San Diego,  
and the Muscle Development and Regeneration Program  
Sanford-Burnham Medical Research Institute  
10901 North Torrey Pines Road  
La Jolla, California 92037  
mmercola@sanfordburnham.org

<sup>2</sup>The Cardiovascular Research Center,  
Icahn School of Medicine at Mount Sinai,  
New York, NY 10029

<sup>3</sup>Department of Cardiology, University Medical Center Utrecht, Utrecht, the Netherlands and  
ICIN, Netherlands Heart Institute, Utrecht, the Netherlands

<sup>4</sup>Global Research Laboratory, Gwangju Institute of Science and Technology,  
Gwangju, Korea

#### Contents

##### 1. Supplementary Tables 1-3

## Supplementary Tables

### Supplementary Table 1

microRNAs confirmed to inhibit the eGFP-SERCA2a 3'UTR fusion transcript in the primary screen assay

| microRNA       | % Inhibition | p-value     | conservation |
|----------------|--------------|-------------|--------------|
| hsa-miR-346    | 80.99247163  | 5.32233E-05 | 1            |
| hsa-miR-376a*  | 80.67109749  | 5.91496E-05 | 1            |
| hsa-miR-132    | 79.36745878  | 6.20595E-05 | 2            |
| hsa-miR-361-3p | 78.85458317  | 6.72732E-05 | 0            |
| has-miR-365    | 74.48046024  | 0.000118857 | 2            |
| hsa-miR-192    | 74.13398041  | 0.000106474 | 2            |
| hsa-miR-22     | 73.55894622  | 0.000128031 | 2            |
| hsa-miR-655    | 73.55337769  | 0.000113881 | 0            |
| hsa-miR-518f*  | 70.60204452  | 0.000186218 | 0            |
| hsa-miR-641    | 69.9709797   | 0.000202443 | 0            |
| hsa-miR-136    | 69.20063646  | 0.000186708 | 1            |
| hsa-miR-379    | 67.5394754   | 0.000208388 | 1            |
| hsa-miR-146a   | 67.4320154   | 0.000296461 | 2            |
| hsa-miR-1268   | 64.89555056  | 0.000299082 | 0            |
| hsa-miR-510    | 61.77727977  | 0.000388732 | 0            |
| hsa-miR-493*   | 61.66179919  | 0.000407322 | 0            |
| hsa-miR-1181   | 61.07225296  | 0.000422212 | 0            |
| hsa-miR-489    | 61.05624092  | 0.000470095 | 2            |
| hsa-miR-25     | 60.49249903  | 0.000435206 | 2            |
| hsa-miR-1271   | 60.08764848  | 0.000412262 | 2            |
| hsa-miR-1289   | 59.50868784  | 0.000557928 | 0            |
| hsa-miR-532-3p | 58.74229446  | 0.000634729 | 0            |
| hsa-miR-650    | 58.11050937  | 0.000562452 | 0            |
| hsa-miR-545*   | 58.10588279  | 0.000985349 | 0            |
| hsa-hsa-miR-17 | 57.83026355  | 0.000618753 | 2            |
| hsa-miR-1826   | 57.67481764  | 0.000779978 | 0            |
| hsa-miR-96*    | 57.52630557  | 0.000672782 | 2            |
| hsa-miR-200b   | 56.7970574   | 0.000628775 | 2            |

|                 |             |             |   |
|-----------------|-------------|-------------|---|
| hsa-miR-338-5p  | 56.63809328 | 0.000630039 | 0 |
| hsa-miR-760     | 55.94751228 | 0.00076837  | 0 |
| hsa-miR-1228*   | 55.60390456 | 0.006898672 | 0 |
| hsa-miR-1290    | 54.39392509 | 0.000915859 | 0 |
| hsa-miR-511     | 53.01741968 | 0.002094018 | 0 |
| hsa-miR-103-2   | 52.72457439 | 0.001540782 | 2 |
| hsa-miR-657     | 52.19393814 | 0.00140793  | 0 |
| hsa-miR-548d-3p | 51.84547609 | 0.00189473  | 0 |
| hsa-miR-202     | 51.41224777 | 0.002045283 | 1 |
| hsa-miR-423-3p  | 51.32883469 | 0.001316693 | 0 |
| hsa-miR-539     | 50.83376221 | 0.002146518 | 1 |
| hsa-miR-29b     | 50.51561473 | 0.001675845 | 2 |
| hsa-miR-593     | 49.41504139 | 0.001627232 | 0 |
| hsa-miR-1287    | 48.84290102 | 0.00156881  | 0 |
| hsa-miR-874     | 48.77629085 | 0.005761531 | 1 |
| hsa-miR-632     | 48.68117424 | 0.001513586 | 0 |
| hsa-miR-298     | 48.11594395 | 0.002021351 | 0 |
| hsa-miR-621     | 46.83251027 | 0.002414331 | 0 |
| hsa-miR-24-1*   | 46.46532287 | 0.002666724 | 2 |
| hsa-miR-512-3p  | 46.33635395 | 0.002896382 | 0 |
| hsa-miR-1296    | 46.30272219 | 0.003197384 | 0 |
| hsa-miR-486-5p  | 45.35176147 | 0.006869943 | 1 |
| hsa-miR-888     | 45.01699329 | 0.003404262 | 0 |
| hsa-miR-185     | 44.03597034 | 0.003474043 | 1 |
| hsa-miR-324-5p  | 43.34089609 | 0.006605924 | 1 |
| hsa-miR-627     | 42.49883801 | 0.005236739 | 0 |
| hsa-miR-301b    | 42.08558824 | 0.005367971 | 0 |
| hsa-miR-933     | 41.81702545 | 0.004582975 | 0 |
| hsa-miR-151-5p  | 41.46036462 | 0.00469128  | 0 |
| hsa-miR-1273    | 40.25804615 | 0.005667077 | 0 |
| hsa-miR-200b*   | 39.5197365  | 0.005266684 | 2 |
| hsa-miR-661     | 39.25728318 | 0.011202166 | 0 |
| hsa-miR-483-5p  | 36.77548192 | 0.012979638 | 0 |
| hsa-miR-493     | 36.64972869 | 0.007543937 | 0 |

|                 |             |             |   |
|-----------------|-------------|-------------|---|
| hsa-miR-645     | 36.42883929 | 0.011064936 | 0 |
| hsa-miR-141     | 35.07166974 | 0.015614575 | 2 |
| hsa-miR-1224-5p | 34.8810789  | 0.010524377 | 0 |
| hsa-miR-626     | 34.47731879 | 0.014511279 | 0 |
| hsa-miR-26a-1*  | 33.1167919  | 0.018040856 | 2 |
| abi-13242       | 30.04330505 | 0.027578154 | 0 |
| hsa-miR-212     | 29.78331172 | 0.029586534 | 2 |
| hsa-miR-1299    | 29.50034848 | 0.034501079 | 0 |
| hsa-miR-29c     | 28.90602278 | 0.021812834 | 2 |
| hsa-miR-1975    | 28.71812077 | 0.032634286 | 0 |
| hsa-miR-188-3p  | 28.56285993 | 0.0337377   | 0 |
| hsa-miR-1303    | 28.12752016 | 0.033872202 | 0 |
| hsa-miR-500     | 28.01127437 | 0.02246561  | 0 |
| hsa-miR-519c-3p | 27.99004101 | 0.030065494 | 0 |
| hsa-miR-2052    | 27.07716367 | 0.037869696 | 0 |
| hsa-miR-671-5p  | 26.48213729 | 0.038303191 | 0 |
| hsa-miR-767-5p  | 26.19956964 | 0.03385671  | 0 |
| hsa-miR-128     | 25.95506908 | 0.046439374 | 2 |
| hsa-miR-205     | 25.94412511 | 0.03911706  | 2 |
| hsa-miR-194*    | 25.41378256 | 0.03534099  | 2 |

Inhibitory activity is the area under the curve (A.U.C.) from the 5-point dose response confirmatory assay. Data are expressed as a percentage of the inhibitory activity achieved with SERCA2a siRNA (set to 100% inhibition) and normalized to inert sequence control siRNA (set to 0% inhibition). The assay was performed in triplicate, and only those miRs yielding a statistically significant activity relative to the inert sequence control siRNA ( $P < 0.05$ , Student's t-test) are listed. Evolutionary conservation is indicated: 0 = poorly-conserved, 1 = conserved across human, mouse, rat and dog species; 2 = highly conserved across human mouse, rat, dog and chicken species (nomenclature from TargetScan v6.2 (<http://www.targetscan.org>)). miRs highlighted in blue are reported to be upregulated in heart failure (see **Detailed Methods**).

**Supplementary Table 2****Echocardiographic assessment of cardiac function in cohort groups.**

|            | Sham    |        | HF + SC |        | HF + anti- <i>miR-25</i> |        | AAV9-VLP |        | AAV9- <i>miR-25</i> |        | AAV9- <i>miR-92a</i> |        |
|------------|---------|--------|---------|--------|--------------------------|--------|----------|--------|---------------------|--------|----------------------|--------|
|            | Average | Stdev  | Average | Stdev  | Average                  | Stdev  | Average  | Stdev  | Average             | Stdev  | Average              | Stdev  |
| IVSd (mm)  | 1.09    | 0.16   | 1.06    | 0.18   | 1.13                     | 0.16   | 1.044    | 0.011  | 1.064               | 0.053  | 1.128                | 0.080  |
| LVIDd (mm) | 2.98    | 0.61   | 4.23    | 0.26   | 3.51                     | 0.11   | 3.458    | 0.215  | 3.636               | 0.172  | 3.488                | 0.185  |
| LVPWd (mm) | 1.08    | 0.10   | 1.09    | 0.16   | 1.12                     | 0.15   | 1.044    | 0.016  | 1.032               | 0.067  | 1.096                | 0.077  |
| IVSs (mm)  | 1.73    | 0.15   | 1.78    | 0.35   | 1.97                     | 0.19   | 1.944    | 0.083  | 1.85                | 0.073  | 1.934                | 0.082  |
| LVIDs (mm) | 1.27    | 0.13   | 2.37    | 0.21   | 1.61                     | 0.15   | 1.282    | 0.081  | 1.628               | 0.087  | 1.382                | 0.103  |
| LVPWs (mm) | 1.81    | 0.06   | 1.81    | 0.28   | 1.76                     | 0.19   | 1.728    | 0.067  | 1.76                | 0.068  | 1.84                 | 0.087  |
| EF (%)     | 93.923  | 0.518  | 77.771  | 5.220  | 89.620                   | 2.224  | 94.432   | 0.503  | 90.292              | 1.119  | 93.192               | 1.288  |
| FS (%)     | 61.695  | 1.121  | 39.987  | 5.664  | 54.308                   | 3.458  | 62.876   | 1.153  | 52.636              | 1.510  | 60.364               | 2.489  |
| HR (BPM)   | 595.250 | 21.701 | 623.571 | 35.256 | 622.400                  | 25.560 | 652.106  | 45.286 | 664.346             | 31.936 | 667.338              | 28.679 |

|            | Sham + SC |        | Sham + anti- <i>miR-25</i> |        | S2a KO + SCS |        | S2a KO + anti- <i>miR-25</i> |        |
|------------|-----------|--------|----------------------------|--------|--------------|--------|------------------------------|--------|
|            | Average   | Stdev  | Average                    | Stdev  | Average      | Stdev  | Average                      | Stdev  |
| IVSd (mm)  | 0.965     | 0.033  | 1.048                      | 0.119  | 0.882        | 0.052  | 0.954                        | 0.169  |
| LVIDd (mm) | 2.918     | 0.135  | 3.078                      | 0.189  | 3.375        | 0.185  | 3.903                        | 0.277  |
| LVPWd (mm) | 0.905     | 0.047  | 0.970                      | 0.067  | 0.893        | 0.042  | 0.968                        | 0.124  |
| IVSs (mm)  | 1.435     | 0.510  | 1.830                      | 0.135  | 1.618        | 0.111  | 1.715                        | 0.137  |
| LVIDs (mm) | 1.020     | 0.042  | 1.220                      | 0.109  | 1.690        | 0.380  | 2.149                        | 0.278  |
| LVPWs (mm) | 1.540     | 0.040  | 1.780                      | 0.163  | 1.513        | 0.105  | 1.683                        | 0.130  |
| EF (%)     | 94.410    | 0.231  | 94.040                     | 0.701  | 82.388       | 1.455  | 81.951                       | 4.529  |
| FS (%)     | 61.377    | 0.592  | 61.943                     | 1.413  | 44.687       | 1.307  | 43.655                       | 3.967  |
| HR (BPM)   | 593.613   | 24.302 | 604.398                    | 28.143 | 514.195      | 13.864 | 508.098                      | 55.448 |

**Supplementary Table 3*****In vivo* hemodynamic assessment of cardiac function in cohort groups.**

|                  | Sham    |       | HF + SC |       | HF + anti- <i>miR-25</i> |       | AAV9-VLP |       | AAV9- <i>miR25</i> |       | AAV9- <i>miR92a</i> |       |
|------------------|---------|-------|---------|-------|--------------------------|-------|----------|-------|--------------------|-------|---------------------|-------|
|                  | Average | Stdev | Average | Stdev | Average                  | Stdev | Average  | Stdev | Average            | Stdev | Average             | Stdev |
| dPdtMAX (mmhg/s) | 3953    | 321   | 3917    | 524   | 5327                     | 702   | 3916     | 588   | 3496               | 399   | 4061                | 309   |
| dPdtMin (mmhg/s) | -2953   | -214  | -2543   | -462  | -4015                    | -553  | -3098    | -414  | -3543              | -462  | -3952               | -412  |
| EDV (ul)         | 39      | 5     | 92      | 14    | 57                       | 12    | 29       | 4     | 55                 | 14    | 36                  | 12    |
| ESV (ul)         | 11      | 4     | 82      | 18    | 29                       | 14    | 5        | 3     | 38                 | 16    | 10                  | 14    |
| SV (ul)          | 29      | 3     | 10      | 5     | 28                       | 6     | 24       | 6     | 18                 | 3     | 25                  | 5     |
| EF (%)           | 73      | 5     | 17      | 17    | 49                       | 16    | 73       | 5     | 47                 | 18    | 79                  | 11    |
| HR (BPM)         | 414     | 11    | 368     | 31    | 392                      | 25    | 416      | 63    | 453                | 11    | 396                 | 30    |

|                  | Sham + SC |       | Sham + anti- <i>miR25</i> |       | S2a KO + SCS |       | S2a KO + anti- <i>miR25</i> |       |
|------------------|-----------|-------|---------------------------|-------|--------------|-------|-----------------------------|-------|
|                  | Average   | Stdev | Average                   | Stdev | Average      | Stdev | Average                     | Stdev |
| dPdtMAX (mmhg/s) | 4366      | 513   | 4689                      | 616   | 560          | 513   | 1112                        | 616   |
| dPdtMin (mmhg/s) | -3953     | -364  | -4132                     | -412  | -512         | -434  | -973                        | -570  |
| EDV (ul)         | 39        | 5     | 36                        | 7     | 110          | 22    | 118                         | 31    |
| ESV (ul)         | 11        | 4     | 10                        | 5     | 93           | 26    | 103                         | 32    |
| SV (ul)          | 29        | 3     | 30                        | 3     | 17           | 7     | 14                          | 10    |
| EF (%)           | 73        | 5     | 75                        | 6     | 17           | 21    | 19                          | 26    |
| HR (BPM)         | 472       | 33    | 481                       | 28    | 220          | 55    | 286                         | 49    |

**Table 2** lists echocardiographic parameters at 5.5 months for sham, TAC-operated (heart failure, HF) + scrambled sequence control anti-miR (SC) and TAC-operated (HF) + anti-*miR-25*. Methods: Briefly, at 10-12 weeks post-TAC surgery, when echocardiographic monitoring showed <50% LVEF and evidence of LV dilation, animals were intravenously injected with anti-

*miR-25* or control (scrambled sequence) anti-miR formulated with *in vivo*-jetPEI™ reagent mixture for 3 consecutive days followed by an additional anti-*miR-25* injections every week for next 3 weeks. At 5.5 months, animals were sacrificed. See Detailed Methods.

**Table 2** also lists echocardiographic parameters at 1 month after control or anti-*miR-25* injection in Sham-operated and *Serca2a* knockout (S2a KO) mice, and at 6 weeks after AAV9-VLP (control), AAV9-*miR25* and AAV9-*miR-92a* infection of WT mice. Anti-miR injections, AAV transduction and description of S2a KO mice are in Detailed Methods.

**Table 3** lists *in vivo* hemodynamic parameters at the same time points as for the echocardiographic data in Table 2.
